# Supplementary material
Source: publisher figshare collection journal article supplement (https://diabetesjournals.figshare.com/ndownloader/files/32606447)
Supplement: Supplementary file 1 [file 32606447]

## Sheet: Sheet1
Supplemental Table 2a. Descriptive statistics for trials contributing eight-to-ten week data
		DioGenes			NUGENOB
		Low calorie, low fat			Total		Low fat		Moderate Fat
N		765			760		384		376
		Mean or N	SD or %		Mean or N	SD or %	Mean or N	SD or %	Mean or N	SD or %
Age		41.5	6.2		37.1368	7.90822	37.0104	7.91864	37.266	7.90602
Female		496	0.648366		570	0.75	287	0.747396	283	0.75266
Body mass index (kg/m2)
	Baseline	34.4095	4.74616		35.5695	4.82525	35.5052	4.81315	35.6351	4.84309
	Change at 8-10 weeks	-3.7879	1.0873		-2.48461	1.61461	-2.51742	1.66522	-2.44892	1.55961
Waist Circumference (cm)
	Baseline	99.9696	17.584		106.055	12.9151	105.953	13.0269	106.158	12.8171
	Change at 8-10 weeks	-9.9075	4.6399		-6.32504	4.50728	-6.56963	4.57731	-6.06013	4.42251
Waist to hip ratio
	Baseline	0.924526	0.0905137		0.890678	0.0949435	0.891904	0.0934924	0.889436	0.0965015
	Change at 8-10 weeks	-0.03	0.0429		-0.01968	0.03733	-0.02069	0.03725	-0.0186	0.03745
Polygenic risk scores
	PS: Full samples	44.2448	4.89258		44.7921	5.04052	44.6818	4.96983	44.902	5.11453
	PS: Female	47.6247	5.06241		48.2768	5.19662	48.1247	4.94361	48.4284	5.44182
	PS: Male	34.9642	7.09583		34.9376	7.82378	35.1171	8.0557	34.7581	7.62675
